# Supplementary material
Source: publisher site journal article supplement (https://kjim.org/upload/media/kjim-2024-246-Supplementary-Fig-1.pdf)
Supplement: Supplementary file 1 [file kjim-2024-246-Supplementary-Fig-1.pdf]

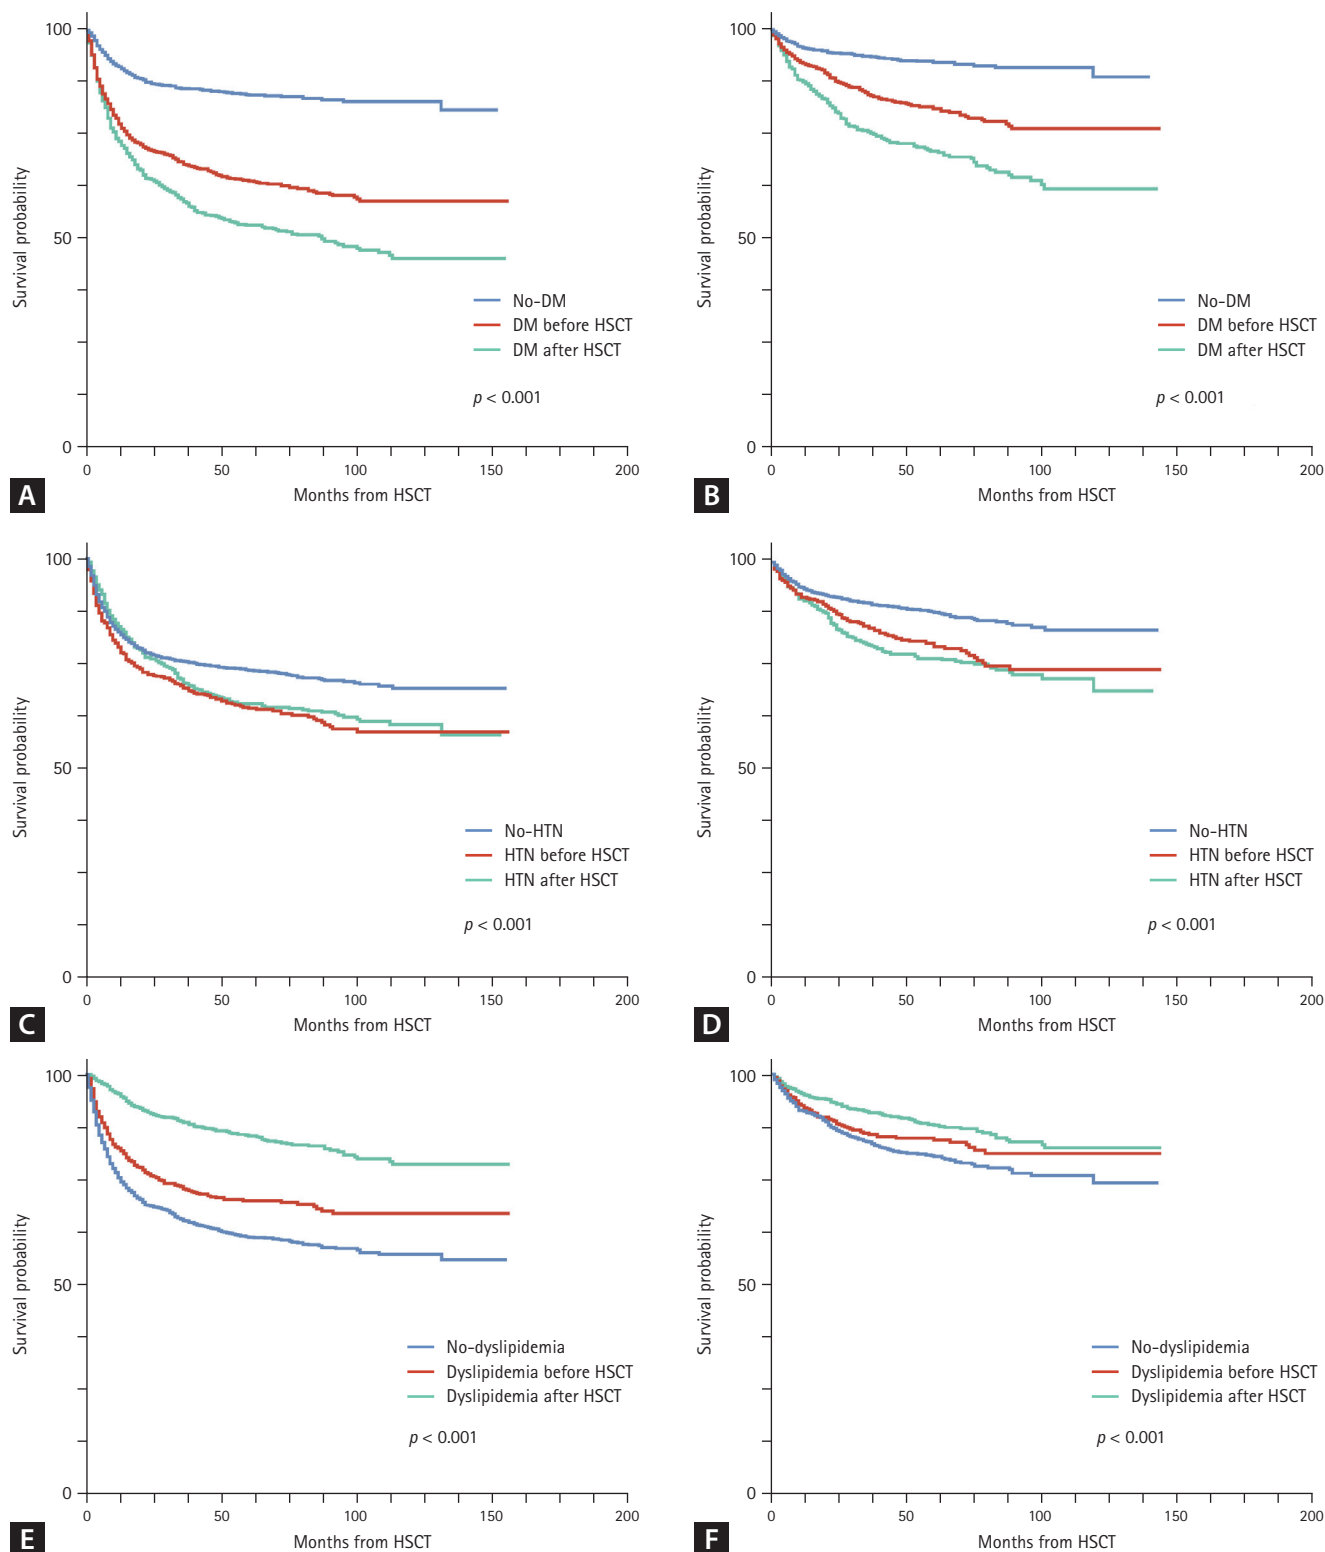

**Supplementary Figure 1.** Kaplan–Meier survival curve analysis after HSCT according to metabolic disease profile. Mortality according to DM (A), HTN (C), and dyslipidemia (E). Mortality according to DM (B), HTN (D), and dyslipidemia (F), including only patients who survived at least 12 months after HSCT. HSCT, hematopoietic stem cell transplantation; DM, diabetes mellitus; HTN, hypertension.
